# Supplementary material for: Physiological Changes and Transcriptomic Analysis throughout On-Tree Fruit Ripening Process in Persimmon (Diospyros kaki L.)
Source: MDPI journal article supplement (doi:10.3390/plants12162895), 2023-08-08
Supplement: s1 [file s1]

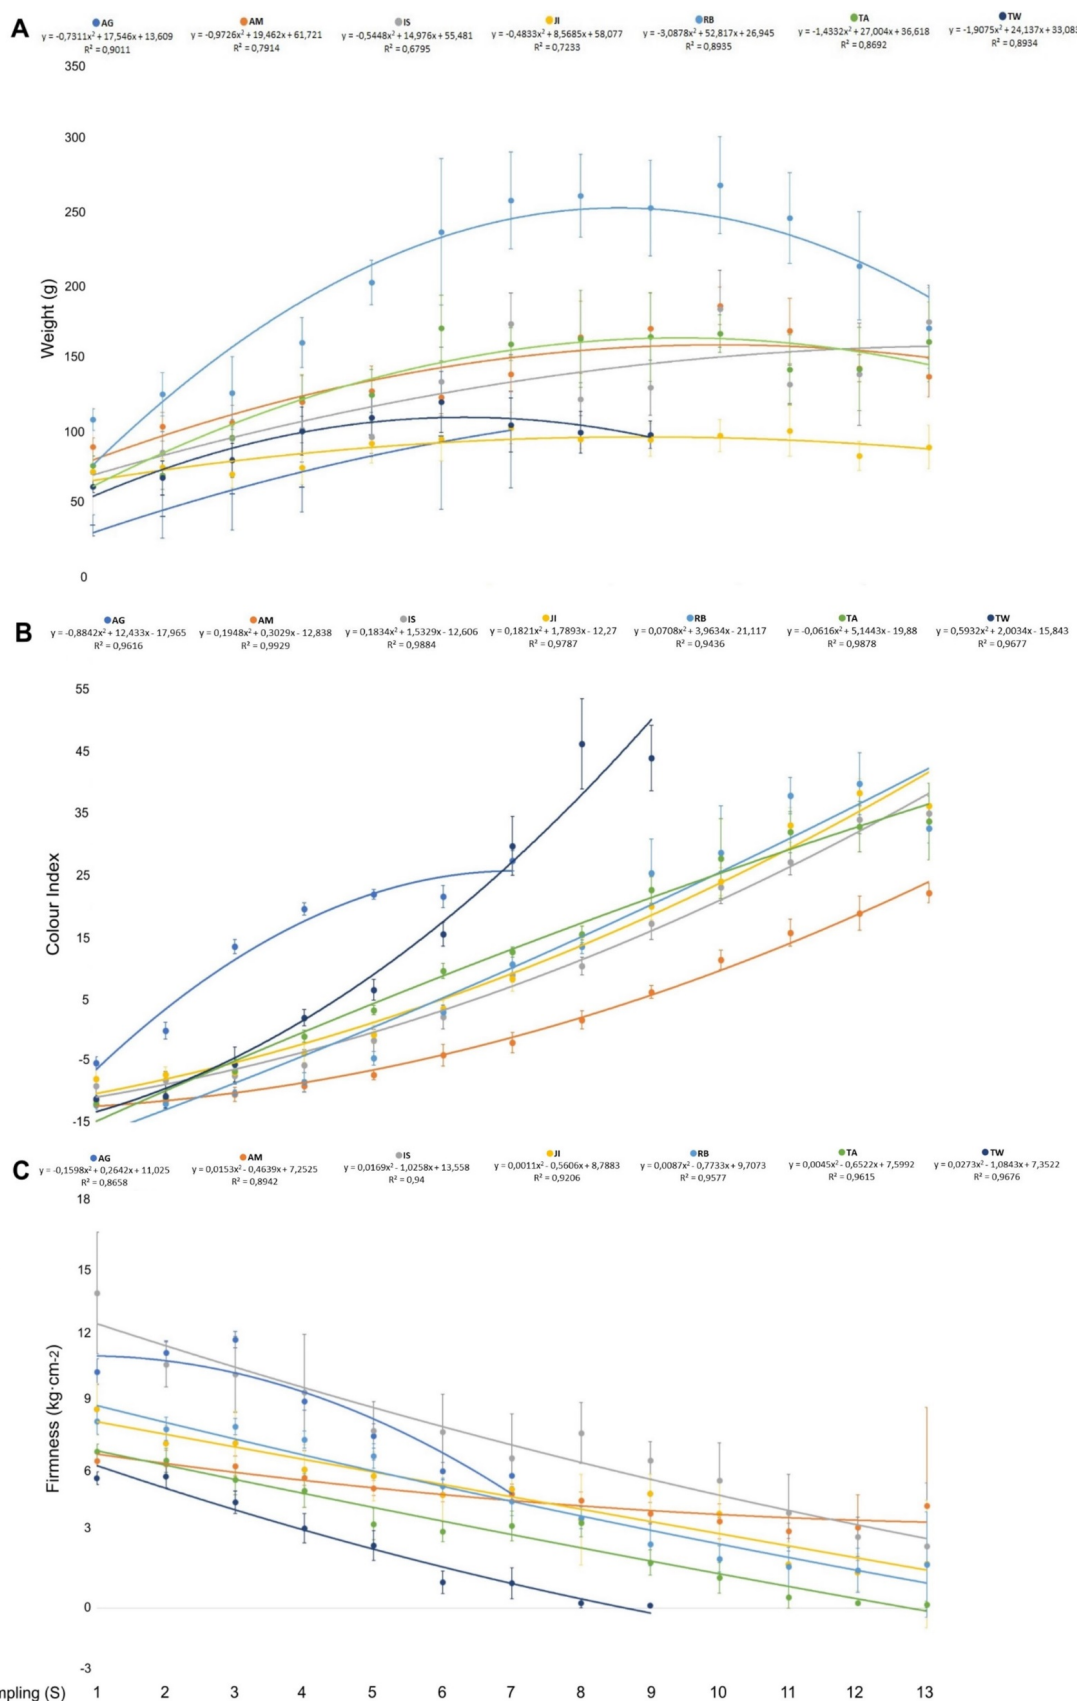

**Figure S1.** Least-squares regression analysis and 2<sup>nd</sup> order polynomial curve fit for each phenotypic trait. (A) Weight, (B) Colour Index and (C) Firmness. AG: Agakaki, AM: Amahyakume, IS: Isahaya, JI: Jiro, RB: Rojo Brillante, TA: Takura, TW: Tone Wase. Standard deviations (SD) are represented in vertical error bars.

**Table S1.** Results of non-parametric statistical test Kruskal-Wallis analysis of relative gene expression level and morphological traits in studied accessions. Significant values are highlighted in yellow ( $p < 0.05$ ). Comp.=Comparisons, Sig.=Significance.

[illegible]





| Name           | Forward primer (5' to 3') | Reverse primer (5' to 3')  | Source                                                                                                                          |
|----------------|---------------------------|----------------------------|---------------------------------------------------------------------------------------------------------------------------------|
| <i>DkACO1</i>  | TGGCAATGATGCTGTTATCTATC   | CGAACATATTACAAATAACATGTGTC | Ortiz et al., 2006. doi: <a href="https://doi.org/10.2503/jshs.75.178">https://doi.org/10.2503/jshs.75.178</a>                  |
| <i>DkACO2</i>  | CAGCGACGACGATGATTATCCAGC  | CAGAGGGCTTGGCTTAGACTGTGGC  | Ortiz et al., 2006. doi: <a href="https://doi.org/10.2503/jshs.75.178">https://doi.org/10.2503/jshs.75.178</a>                  |
| <i>DkACS2</i>  | TCCAACATCAGAGTAAAGGGCT    | GTCATAGGTCGACGTCACATTTCC   | Ortiz et al., 2006. doi: <a href="https://doi.org/10.2503/jshs.75.178">https://doi.org/10.2503/jshs.75.178</a>                  |
| <i>DkEIL1</i>  | CGATGGAGAGGGTTAAAGATAGG   | GACACTGCAGGAACATCACATGTAT  | This study                                                                                                                      |
| <i>DkEIL3</i>  | TCAGGAGAAGTACCCCTTAGAGAA  | TATAAGGAGGACTCGACCTTTGG    | This study                                                                                                                      |
| <i>DkERF8</i>  | ATTCGTGAAGGGGGACAATTC     | ATAAGTACGCGCGCAAAATTA      | Park et al., 2017. J Am Pom Soc. (APS) 71:103-111                                                                               |
| <i>DkERF16</i> | TACGGCTATGTGATCTACCTCTC   | CCTACTACACAGAGGGGTAAAAAT   | Min et al., 2014. doi: <a href="https://doi.org/10.1371/journal.pone.0097043">https://doi.org/10.1371/journal.pone.0097043</a>  |
| <i>DkERF18</i> | GACGTCGCTCTCCCTCGTCTTA    | GACTATTTTAAACATCCACATCG    | Min et al., 2014. doi: <a href="https://doi.org/10.1371/journal.pone.0097043">https://doi.org/10.1371/journal.pone.0097043</a>  |
| <i>DkERS1</i>  | CAGAACAGAGGGTCATGATAGAGA  | CTTCTCATCCAAACAGCATAGAC    | This study                                                                                                                      |
| <i>DkETR2</i>  | GTCTCTTACTCTGTTAGTGTGCTC  | CTTTTCATCTAATGTGAGCCCTC    | This study                                                                                                                      |
| <i>DkETR3</i>  | ATCAGAGCTTCTACTTCGGTAGC   | GTTTCAGTTAATGGTAGCCCTCAC   | This study                                                                                                                      |
| <i>DkPSY</i>   | AACTATGGCTCTTTCTATGCG     | AACTTTCTGCTCCGATGA         | Zhao et al., 2011. doi: <a href="https://doi.org/10.1007/s11105-010-0272-3">https://doi.org/10.1007/s11105-010-0272-3</a>       |
| <i>DkTUA</i>   | AGCCCTCAAGTATGATGGG       | GCCTACAGCAGCATTAAC         | Wang et al., 2016. doi: <a href="https://doi.org/10.1371/journal.pone.0160885">https://doi.org/10.1371/journal.pone.0160885</a> |
| <i>DkXTH9</i>  | AGGGCATGAGGGTATATGCAAG    | AAATCCGACCTCTTTTGCAAGCC    | This study                                                                                                                      |

**Table S2.** List of gene-specific primers used for real-time quantitative PCR expression analysis.
